# Supplementary material
Source: MDPI journal article supplement (https://www.mdpi.com/1996-1073/14/9/2609)
Supplement: s1 [file s1]

|                    |                                                                                                                                                                                                                                                                                                                                                                 |
|--------------------|-----------------------------------------------------------------------------------------------------------------------------------------------------------------------------------------------------------------------------------------------------------------------------------------------------------------------------------------------------------------|
| id                 | 1                                                                                                                                                                                                                                                                                                                                                               |
| Job Profile        | Renewable energy consultant                                                                                                                                                                                                                                                                                                                                     |
| ESCO URL           | <a href="http://data.europa.eu/esco/occupation/114e1eff-215e-47df-8e10-45a5b72f8197">http://data.europa.eu/esco/occupation/114e1eff-215e-47df-8e10-45a5b72f8197</a>                                                                                                                                                                                             |
| Alternative labels | sustainable energy survey consultant // sustainable energy consultant // renewable energy market consultant // sustainable energy technical consultant // sustainable energy research consultant // renewable energy survey consultant // sustainable energy market consultant // renewable energy research consultant // renewable energy technical consultant |
| Description        | Renewable energy consultants advise clients on the advantages and disadvantages of different renewable energy sources. They conduct surveys and interviews to research demand of and opinions on renewable energy, and strive to advise clients on the most advantageous source of renewable energy for their purpose.                                          |
| ISCO number        | 2433                                                                                                                                                                                                                                                                                                                                                            |
|                    | Essential                                                                                                                                                                                                                                                                                                                                                       |
|                    | knowledge                                                                                                                                                                                                                                                                                                                                                       |

characteristics of products  
characteristics of services  
energy efficiency  
market analysis  
renewable energy technologies  
solar energy

skill/competence

advise on heating systems energy efficiency  
assess customers  
develop professional network  
identify energy needs  
inform on government funding  
perform market research  
promote environmental awareness  
promote sustainable energy  
provide information on geothermal heat pumps  
provide information on solar panels  
provide information on wind turbines

Optional  
knowledge

domestic heating systems  
electricity market  
energy performance of buildings  
industrial heating systems  
sales argumentation  
sales strategies

skill/competence

advise on utility consumption  
answer requests for quotation  
assess supplier risks  
attend trade fairs  
carry out sales analysis  
identify customer's needs  
identify suppliers  
inform customers on energy consumption fees  
manage contracts  
negotiate improvement with suppliers  
negotiate terms with suppliers  
prospect new customers

Future

Essential

ERP  
Big Data  
Basic digital skills  
Basic data input and processing  
Use of digital communication tools  
Financial literacy  
Advanced communication skills  
Negotiation skills  
Customer relationship management  
Entrepreneurship and initiative taking  
Risk management  
Opportunity assessment  
Critical thinking and decision making  
Advanced literacy  
Environmental awareness  
Energy efficiency  
Knowledge and understanding of international and national standards and legislation  
Business Intelligence (BI)  
E-commerce  
Conflict resolution  
Interpersonal skills and empathy  
Active listening  
Appropriate linguistic skills  
Cultural empathy

Optional

Complex information processing and interpretation  
Process analysis  
Creativity  
Personal experience  
Ethical skills  
Teaching and training others  
Cross-functional process know-how  
Knowledge and understanding of quality procedures related to digital transformation  
Continuous learning  
Interdisciplinary thinking and acting  
Basic numeracy and communication  
Quantitative and statistical skills  
Circular economy  
Climate change risk management  
Product life cycle impact assessment  
Adaptability and adapt to change  
Teaching and training others

## Renewable energy engineer

<http://data.europa.eu/esco/occupation/0e99c929-364f-4b0a-8a64-2aab42420f00>

renewable energy engineering specialist // project engineer, PV array // renewable power engineer // renewables engineer // industrial energy engineer // asset engineer, renewable power // project engineer, offshore wind // renewable energy technology engineering adviser // renewable energy technology engineering consultant // renewable energies engineer // renewable energy engineering expert // renewable energy technology engineering expert // renewable energy engineering consultant // project engineer, energy efficiency // wind turbine project engineer // renewable energy systems engineer // turbine engineer // project engineer, renewables // renewable energy engineering adviser // renewable energy technology engineer // renewable energy technology engineering specialist

Renewable energy engineers research alternative sources of energy in order to design systems for renewable energy production. They strive to optimise energy production from renewable sources, and reduce production expenses and environmental strain. They design systems which focus on energy sustainability and efficiency.

2149

Essential

knowledge

civil engineering  
electrical engineering  
engineering processes  
environmental engineering  
fluid mechanics  
industrial heating systems  
mechanical engineering  
mining, construction and civil engineering  
machinery products  
power engineering  
renewable energy technologies  
solar energy  
technical drawings

skill/competence

adapt energy distribution schedules  
adjust engineering designs  
approve engineering design  
carry out energy management of facilities  
design wind turbines  
ensure compliance with safety legislation  
inform on government funding  
make electrical calculations  
manage engineering project  
perform project management  
perform scientific research  
promote sustainable energy  
provide information on geothermal heat pumps  
provide information on solar panels  
provide information on wind turbines  
research locations for wind farms  
use CAD software  
use technical drawing software  
use thermal management

Optional

knowledge



electric generators  
electrical power safety regulations  
energy market  
energy performance of buildings  
engineering principles  
power electronics

skill/competence

analyse energy consumption  
assess project resource needs  
coordinate electricity generation  
create AutoCAD drawings  
develop material testing procedures  
examine engineering principles  
identify energy needs  
inspect facility sites  
inspect wind turbines  
maintain photovoltaic systems  
manage contracts  
oversee quality control  
prepare technical reports  
report test findings  
troubleshoot  
use software tools for site modelling

Future

Essential

IoT  
Big Data  
Artificial Intelligence (AI)  
Augmented Reality  
Knowledge and understanding of quality procedures related to digital transformation  
Sensors Technology  
Machine Learning

Cloud Computing  
Digital twin  
Communication among components, equipment (M2M), and environment  
Traceability  
Advanced IT skills and programming  
Advanced data analysis and modelization  
Data management-safe storage  
Cybersecurity  
Use of digital communication tools  
Risk management  
Opportunity assessment  
Adaptability and adapt to change  
Critical thinking and decision making  
Cross-functional process know-how  
Interdisciplinary thinking and acting  
Advanced literacy  
Quantitative and statistical skills  
Appropriate linguistic skills  
Complex problem solving  
Environmental awareness  
Energy efficiency  
Platforms for energy management of equipment and plants  
Climate change risk management  
Knowledge and understanding of international and national standards and legislation  
Monitoring systems of energy consumption  
Entrepreneurship and initiative taking  
Continuous learning  
Complex information processing and interpretation  
Waste reduction and waste management  
Sustainable resource management  
Water conservation  
Circular economy  
Risk management

Optional

Business Intelligence (BI)  
Financial literacy  
Advanced communication skills  
Negotiation skills  
Continuous learning  
Ethical skills  
Active listening  
Teamwork skills  
Conflict resolution  
Leadership and managing others  
Agile human-machine interfaces (HM)  
Cyber-physical systems (CBS)  
Creativity  
Resource reuse/recycling  
Interpersonal skills and empathy  
Teaching and training others

3

Renewable energy sales representative

<http://data.europa.eu/esco/occupation/ff3a164d-4045-4511-a472-49093dabf9fc>

alternative energy sales promoter // renewable energy salesperson // renewable energy salesman // renewable energy sales rep // alternative energy seller // renewable energy sales negotiator // renewable energy seller // alternative energy saleswoman // renewable energy sales consultant // alternative energy sales consultant // alternative energy salesperson // alternative energy sales negotiator // alternative energy salesman // renewable energy saleswoman // residential renewable energy sales representative // residential alternative energy sales representative // alternative energy sales rep // renewable energy sales promoter

Renewable energy sales representatives assess clients' energy supply needs, and attempt to secure sales of renewable energy methods. They promote renewable energy suppliers and the use of renewable energy products, and liaise with consumers to increase sales.

3322

Essential

knowledge

characteristics of products  
characteristics of services  
renewable energy technologies  
sales argumentation  
sales strategies  
solar energy

#### skill/competence

advise on heating systems energy efficiency  
answer requests for quotation  
assess customers  
carry out sales analysis  
identify customer's needs  
identify energy needs  
inform customers on energy consumption fees  
inform on government funding  
manage contracts  
promote sustainable energy  
provide information on geothermal heat pumps  
provide information on solar panels  
provide information on wind turbines

#### Optional

#### knowledge

domestic heating systems  
electricity market  
energy performance of buildings  
industrial heating systems

skill/competence

achieve sales targets  
advise on utility consumption  
assess supplier risks  
attend trade fairs  
deliver a sales pitch  
implement marketing strategies  
implement sales strategies  
liaise with advertising agencies  
manage contract disputes  
manage development of promotional material  
monitor after sales records  
negotiate improvement with suppliers  
negotiate terms with suppliers  
perform market research  
plan customers' sales visits  
plan event marketing for promotional campaigns  
prepare sales checks  
promote environmental awareness  
prospect new customers  
review completed contracts

Future

Essential



ERP  
Big Data  
Basic digital skills  
Basic data input and processing  
Use of digital communication tools  
Financial literacy  
Advanced communication skills  
Negotiation skills  
Customer relationship management  
Entrepreneurship and initiative taking  
Risk management  
Opportunity assessment  
Critical thinking and decision making  
Advanced literacy  
Environmental awareness  
Energy efficiency  
Knowledge and understanding of international and national standards and legislation  
Business Intelligence (BI)  
E-commerce  
Conflict resolution  
Interpersonal skills and empathy  
Active listening  
Appropriate linguistic skills  
Cultural empathy

Optional

Complex information processing and interpretation  
Process analysis  
Creativity  
Personal experience  
Ethical skills  
Teaching and training others  
Cross-functional process know-how  
Knowledge and understanding of quality procedures related to digital transformation  
Continuous learning  
Interdisciplinary thinking and acting  
Basic numeracy and communication  
Quantitative and statistical skills  
Circular economy  
Climate change risk management  
Product life cycle impact assessment  
Adaptability and adapt to change  
Teaching and training others

4

### Solar energy technician

<http://data.europa.eu/esco/occupation/75b63949-1b93-4bf2-a777-ccf978dc3e8a>

solar energy system installer // photovoltaic cell technician // solar technician // solar energy farm technician // solar energy panel technician // solar energy generation technician // solar roofer // solar energy system designer // PV field technician // photovoltaic energy installer // solar energy installation technician // solar energy system builder // solar energy plant technician // solar energy system constructor // photovoltaic energy panel installer // solar O and M technician // solar operations and maintenance technician // solar farm technician // photovoltaic field technician // solar energy array technician // photovoltaic system technician // photo-voltaic cell technician // solar energy harvesting technician // solar energy system maker // solar energy panel installer // solar energy system technician

Solar energy technicians install and maintain systems that collect solar energy. They prepare the necessary fixtures, often on roofs, install solar panels, and plug them into an electronic system including an inverter to connect the solar energy systems to the electricity lines.

7411

Essential

knowledge

electrical wiring plans  
electricity  
mechanics  
solar energy

#### skill/competence

comply with legal regulations  
follow health and safety procedures in  
construction  
follow safety procedures when working at  
heights  
inspect construction supplies  
inspect electrical supplies  
install circuit breakers  
install electrical and electronic equipment  
interpret 2D plans  
interpret 3D plans  
mount photovoltaic panels

#### Optional knowledge

building codes  
solar panel mounting systems  
types of photovoltaic panels  
zero-energy building design

skill/competence

answer requests for quotation  
calculate needs for construction supplies  
calculate solar panel orientation  
demonstrate products' features  
estimate profitability  
install inverter  
keep personal administration  
maintain equipment  
maintain solar energy systems  
maintain work area cleanliness  
monitor stock level  
order construction supplies  
process incoming construction supplies  
provide information on solar panels  
rig loads  
use safety equipment in construction  
work in a construction team

Future

Essential

IoT

Big Data

Artificial Intelligence

#### Artificial Intelligence

Collaborative/Autonomous Robotics  
Agile human-machine interfaces (HM)  
Augmented Reality (AR)  
Online inspection and monitoring systems  
Predictive and Proactive maintenance  
Computerized Maintenance Management  
Advanced IT skills and programming  
Basic data input and processing  
Use of digital communication tools  
Basic numeracy and communication  
Quantitative and statistical skills  
Environmental awareness  
Energy efficiency  
Platforms for energy management of equipment and plants  
Use of drones  
Monitoring systems of energy consumption  
Knowledge and understanding of international and national standards and legislation  
Complex problem solving  
Advanced literacy  
Process analysis  
Critical thinking and decision making  
Risk management  
Cross-functional process know-how  
Continuous learning  
Complex information processing and interpretation

Optional

Teamwork skills

Active listening

Appropriate linguistic skills

Data management-safe storage

Sustainable resource management

Resource reuse/recycling

Teaching and training others

Knowledge and understanding of quality procedures  
related to digital transformation

Adaptability and adapt to change

Teaching and training others



5

Solar energy sales consultant

<http://data.europa.eu/esco/occupation/fd4b90ed-6bb4-447e-b13a-afb8015700b3>

solar sales consultant // solar energy sales assistant // solar sales representative // solar sales assistant // solar power sales assistant // solar power sales advisor // solar sales advisor // industrial solar energy sales consultant // solar energy sales advisor // industrial solar power sales consultant // solar power sales representative // solar energy sales representative // domestic solar energy sales consultant // domestic solar power sales consultant

Solar energy sales consultants provide advice on solar energy for domestic or industrial purposes, and aim to promote the use of solar energy as an alternative and more sustainable source of energy. They communicate with prospective clients, and attend networking events, to ensure increased sales of solar energy products.

2433

Essential

knowledge

characteristics of products  
characteristics of services  
domestic heating systems  
electricity market  
energy efficiency  
industrial heating systems  
solar energy

skill/competence

advise on heating systems energy efficiency  
assess customers  
develop professional network  
identify customer's needs  
inform customers on energy consumption fees  
inform on government funding  
promote environmental awareness  
promote sustainable energy  
provide information on solar panels

Optional  
knowledge

electricity  
energy performance of buildings  
renewable energy technologies  
sales argumentation  
sales promotion techniques  
sales strategies

skill/competence

advise on utility consumption  
answer requests for quotation  
assess supplier risks  
attend trade fairs  
carry out sales analysis  
deliver a sales pitch  
identify energy needs  
identify suppliers  
implement marketing strategies  
implement sales strategies  
manage distribution of destination promotional materials  
manage production of destination promotional materials  
negotiate improvement with suppliers  
negotiate sales contracts  
negotiate terms with suppliers  
perform market research  
prepare sales checks  
prospect new customers  
review completed contracts

Future

Essential

ERP  
Big Data  
Basic digital skills  
Basic data input and processing  
Use of digital communication tools  
Financial literacy  
Advanced communication skills  
Negotiation skills  
Customer relationship management  
Entrepreneurship and initiative taking  
Risk management  
Opportunity assessment  
Critical thinking and decision making  
Advanced literacy  
Environmental awareness  
Energy efficiency  
Knowledge and understanding of international and national standards and legislation  
Business Intelligence (BI)  
E-commerce  
Conflict resolution  
Interpersonal skills and empathy  
Active listening  
Appropriate linguistic skills  
Cultural empathy

Optional

Complex information processing and interpretation  
Process analysis  
Creativity  
Personal experience  
Ethical skills  
Teaching and training others  
Cross-functional process know-how  
Knowledge and understanding of quality procedures related to digital transformation  
Continuous learning  
Interdisciplinary thinking and acting  
Basic numeracy and communication  
Quantitative and statistical skills  
Circular economy  
Climate change risk management  
Product life cycle impact assessment  
Adaptability and adapt to change  
Teaching and training others

6

## Solar energy engineer

<http://data.europa.eu/esco/occupation/42dbb769-4c91-47dc-bd16-ec8e70c4180f>

solar power engineer // solar energy technology engineering expert // solar engineer // solar energy technology engineering specialist // solar energy technology engineering adviser // solar energy engineering expert // solar energy systems engineer // solar energy technology engineer // solar energies engineer // solar energy engineering specialist // solar energy engineering adviser // solar energy engineering consultant // solar energy technology engineering consultant

Solar energy engineers design systems which generate electrical energy from sunlight, such as photovoltaic systems. They design and construct systems which optimise the energy output from solar power, and the sustainability of the production process of solar systems.

2149

Essential

knowledge

electrical engineering  
energy  
energy market  
engineering principles  
engineering processes  
power engineering  
solar energy  
technical drawings  
thermodynamics  
types of photovoltaic panels

#### skill/competence

adjust engineering designs  
adjust voltage  
approve engineering design  
conduct engineering site audits  
create AutoCAD drawings  
design solar energy systems  
examine engineering principles  
maintain concentrated solar power systems  
maintain solar energy systems  
manage engineering project  
perform scientific research  
promote sustainable energy  
provide information on solar panels  
use technical drawing software  
use thermal analysis

#### Optional

#### knowledge



electricity market  
fluid mechanics  
industrial heating systems  
quality standards  
renewable energy technologies

skill/competence

assess financial viability  
calculate solar panel orientation  
design thermal equipment  
draw blueprints  
inspect facility sites  
maintain photovoltaic systems  
perform project management  
read engineering drawings  
run simulations  
test procedures in electricity transmission  
troubleshoot  
use CAD software  
wear appropriate protective gear

Future

Essential

IoT  
Big Data  
Artificial Intelligence (AI)  
Augmented Reality (AR)

Sensors Technology  
Machine Learning  
Collaborative/Autonomous Robotics  
Agile human-machine interfaces (HM)  
Cyber-physical systems (CBS)  
Augmented Reality (AR)  
Post-processing  
Communication among components, equipment (M2M), and environment  
Online inspection and monitoring systems  
Equipment and process monitoring & its implementation  
Predictive and Proactive maintenance  
Computerized Maintenance Management  
Advanced IT skills and programming  
Advanced data analysis and modelization  
Quantitative and statistical skills  
Complex information processing and interpretation  
Complex problem solving  
Environmental awareness  
Energy efficiency  
Sustainable resource management  
Climate change risk management  
Monitoring systems of energy consumption  
Platforms for energy management of equipment and plants  
Critical thinking and decision making  
Product life cycle impact assessment  
Process analysis  
Risk management  
Continuous learning  
Adaptability and adapt to change  
Use of digital communication tools

Optional

Business Intelligence (BI)

Knowledge and understanding of quality procedures related to digital transformation

Leadership and managing others

Financial literacy

Interpersonal skills and empathy

Adaptability and adapt to change

Resource reuse/recycling

Sustainable resource management

Teamwork skills

ERP

Conflict resolution

Active listening

Ethical skills

Advanced communication skills

Waste reduction and waste management

Teaching and training others

7

## Solar power plant operator

<http://data.europa.eu/esco/occupation/6d823dbb-4008-4fb7-b98d-f9d934478647>

solar energy plant worker // solar farm worker // solar electricity power plant operator // solar energy plant operator // solar array worker // solar power plant maintenance operator // solar energy plant operative // solar farm operative // solar array operative // solar power plant safety operative // solar electric power plant operator // solar farm operator // solar power plant safety operator // solar electric power plant operative // solar array operator // solar electricity power plant operative // solar power plant maintenance operative

Solar power plant operators operate and maintain equipment which produce electrical energy from solar power. They monitor measuring equipment to ensure the safety of operations, and that the production needs are met. They also react to system problems, and repair faults.

3131

Essential

knowledge

electric current  
electric generators  
electrical power safety regulations  
electricity  
solar energy

skill/competence

apply health and safety standards  
install concentrated solar power systems  
install photovoltaic systems  
maintain concentrated solar power systems  
maintain electrical equipment  
maintain photovoltaic systems  
maintain records of maintenance interventions  
monitor electric generators  
respond to electrical power contingencies

Optional  
knowledge

automation technology  
electricity consumption  
renewable energy technologies

skill/competence

arrange equipment repairs  
control temperature  
coordinate electricity generation  
develop strategies for electricity contingencies  
ensure compliance with electricity distribution  
schedule  
ensure equipment maintenance  
ensure safety in electrical power operations  
install electrical and electronic equipment  
liaise with engineers  
operate steam turbine  
provide information on solar panels  
read engineering drawings  
replace large components  
resolve equipment malfunctions  
set up machine controls  
wear appropriate protective gear

Future

Essential



Artificial Intelligence  
Sensors Technology  
Collaborative/Autonomous Robotics  
Agile human-machine interfaces (HM)  
Augmented Reality (AR)  
Online inspection and monitoring systems  
Digital twin  
Predictive and Proactive maintenance  
Cyber-physical systems (CBS)  
Computerized Maintenance Management  
Use of drones  
Use of digital communication tools  
Quantitative and statistical skills  
Environmental awareness  
Energy efficiency  
Platforms for energy management of equipment and plants  
Monitoring systems of energy consumption  
Knowledge and understanding of international and national standards and legislation  
Complex problem solving  
Advanced literacy  
Process analysis  
Critical thinking and decision making  
Risk management  
Cross-functional process know-how  
Continuous learning  
Complex information processing and interpretation  
Advanced data analysis and modelization

Optional

Teamwork skills  
Active listening  
Appropriate linguistic skills  
Appropriate linguistic skills  
Sustainable resource management  
Resource reuse/recycling  
Teaching and training others  
Knowledge and understanding of quality  
procedures related to digital transformation  
Adaptability and adapt to change

## Wind turbine technician

<http://data.europa.eu/esco/occupation/98562ce3-9632-4226-b129-c67eb9c54f0f>

on-shore wind turbine maintenance technician //  
 wind farm worker // wind turbine service  
 technician // off-shore wind turbine repair  
 technician // onshore wind turbine worker // wind  
 turbine repair technician // wind turbine  
 inspection technician // on-shore wind turbine  
 inspection technician // wind plant technician //  
 on-shore wind turbine repair technician //  
 windfarm worker m,f,n) // wind turbine worker //  
 offshore wind turbine worker // wind energy  
 installer // wind turbine maintenance technician //  
 off-shore wind turbine maintenance technician //  
 wind turbine array worker // off-shore wind  
 turbine inspection technician

Wind turbine technicians maintain and repair wind turbines by performing diagnostic inspections, analysing faults, and performing repair duties. They ensure the wind turbines operate in compliance with regulations, and assist the wind engineers in the construction of wind turbines. Wind turbine technicians may also test and install hardware and software components of wind turbines.

7412

Essential

knowledge

electrical power safety regulations  
electricity  
electronics  
mechanics  
types of wind turbines

#### skill/competence

arrange equipment repairs  
ensure equipment maintenance  
follow safety procedures when working at heights  
inspect wind turbines  
install electrical and electronic equipment  
maintain electrical equipment  
maintain electronic equipment  
maintain hydraulic systems  
maintain records of maintenance interventions  
wear appropriate protective gear

#### Optional

#### knowledge

aerodynamics  
hardware components  
hardware testing methods  
hydraulics  
renewable energy technologies  
technical drawings

skill/competence

assemble electrical components  
ensure compliance with electricity distribution  
schedule  
execute software tests  
inspect underground power cables  
install hydraulic systems  
liaise with engineers  
oversee pre-assembly operations  
provide advice to technicians  
provide information on wind turbines  
read engineering drawings  
repair underground power cables  
replace large components  
report test findings  
resolve equipment malfunctions  
write inspection reports

Future

Essential

Big Data

Artificial Intelligence

Collaborative/Autonomous Robotics

Agile human-machine interfaces (HM)

Augmented Reality (AR)

Online inspection and monitoring systems

Predictive and Proactive maintenance

Computerized Maintenance Management

Advanced IT skills and programming

Basic data input and processing

Use of digital communication tools

Basic numeracy and communication

Quantitative and statistical skills

Environmental awareness

Energy efficiency

Platforms for energy management of equipment and plants

Use of drones

Monitoring systems of energy consumption

Knowledge and understanding of international and national standards and legislation

Complex problem solving

Advanced literacy

Process analysis

Critical thinking and decision making

Risk management

Cross-functional process know-how

Continuous learning

Complex information processing and interpretation

Optional

Teamwork skills

Active listening

Appropriate linguistic skills

Data management-safe storage

Sustainable resource management

Resource reuse/recycling

Deep-sea exploration skills

Working in confined spaces/heights

Team living

Advanced first aid and rescue

Teaching and training others

Knowledge and understanding of quality procedures  
related to digital transformation

Adaptability and adapt to change

Teaching and training others



## Wind energy engineer

<http://data.europa.eu/esco/occupation/1b99cad3-27c6-4e19-83b6-7b5f8338ed2b>

wind energy systems engineer // engineer for wind energy // wind energy technology engineering expert // wind energy technology engineering adviser // wind energy engineering consultant // wind energy engineering expert // wind-turbine engineer // wind energy technology engineer // wind energy technology engineering consultant // wind energy engineering adviser // wind engineer // wind energies engineer // wind turbine engineer // wind energy specialist // wind energy technology engineering specialist // wind power engineer // wind energy engineering specialist

Wind energy engineers design and install wind energy farms and equipment. They research and test locations to find the most productive location, test equipment such as wind-turbine blades, and develop strategies for more efficient energy production, and environmental sustainability.

2149

Essential

knowledge

aerodynamics  
civil engineering  
electric generators  
electrical discharge  
electrical power safety regulations  
engineering principles  
engineering processes  
meteorology  
mining, construction and civil engineering  
machinery products  
renewable energy technologies  
technical drawings  
types of wind turbines

skill/competence

adjust engineering designs  
approve engineering design  
design wind turbines  
develop test procedures  
ensure compliance with safety legislation  
inspect wind turbines  
perform scientific research  
provide information on wind turbines  
record test data  
report test findings  
research locations for wind farms  
test wind turbine blades  
use technical drawing software

Optional

knowledge



skill/competence

assemble electrical components  
coordinate electricity generation  
design wind farm collector systems  
develop strategies for electricity contingencies  
monitor electric generators  
operate meteorological instruments  
oversee pre-assembly operations  
promote sustainable energy  
provide advice to technicians  
respond to electrical power contingencies  
review meteorological forecast data  
wear appropriate protective gear

Future

Essential

IoT  
Big Data  
Artificial Intelligence (AI)  
Augmented Reality (AR)

Sensors Technology  
Machine Learning  
Collaborative/Autonomous Robotics  
Agile human-machine interfaces (HM)  
Cyber-physical systems (CBS)  
Augmented Reality (AR)  
Post-processing  
Communication among components, equipment (M2M), and environment  
Online inspection and monitoring systems  
Equipment and process monitoring & its implementation  
Predictive and Proactive maintenance  
Computerized Maintenance Management  
Advanced IT skills and programming  
Advanced data analysis and modelization  
Quantitative and statistical skills  
Complex information processing and interpretation  
Complex problem solving  
Environmental awareness  
Energy efficiency  
Sustainable resource management  
Climate change risk management  
Monitoring systems of energy consumption  
Platforms for energy management of equipment and plants  
Critical thinking and decision making  
Product life cycle impact assessment  
Process analysis  
Risk management  
Continuous learning  
Adaptability and adapt to change  
Use of digital communication tools

Optional

## Business Intelligence (BI)

Knowledge and understanding of quality procedures related to digital transformation

Leadership and managing others

Financial literacy

Interpersonal skills and empathy

Adaptability and adapt to change

Resource reuse/recycling

Sustainable resource management

Teamwork skills

ERP

Conflict resolution

Active listening

Ethical skills

Advanced communication skills

Waste reduction and waste management

Teaching and training others

Agile human-machine interfaces (HM)

Cyber-physical systems (CBS)

Creativity

Resource reuse/recycling

Interpersonal skills and empathy

## Geothermal power plant operator

<http://data.europa.eu/esco/occupation/c3959398-a5d7-4b26-abcf-ef7af87e5822>

geo-thermal plant operator // geothermal power plant operative // geothermal plant operator // geothermal plant worker // geo-thermal power plant worker // geothermal plant operative // geo-thermal plant worker // geo-thermal plant operative // geo-thermal power plant operative // geothermal power plant worker // geo-thermal power plant operator

Geothermal power plant operators operate and maintain equipment, often steam-driven turbines, which produce electrical energy. They monitor measuring equipment to ensure the safety of operations, and that the production needs are met. They also react to system problems, and repair faults. They may regulate the generators to control the flow of electricity to the power lines.

3131

Essential

knowledge

electric current  
electric generators  
electrical power safety regulations  
electricity  
geothermal power generation methods  
geothermal power plant operations  
thermodynamics

#### skill/competence

apply health and safety standards  
control steam flows  
maintain electrical equipment  
monitor electric generators  
monitor valves  
operate steam turbine  
regulate steam pressure  
troubleshoot  
wear appropriate protective gear

#### Optional knowledge



electricity consumption  
renewable energy technologies

skill/competence

arrange equipment repairs  
coordinate electricity generation  
develop strategies for electricity contingencies  
ensure compliance with electricity distribution  
schedule  
ensure safety in electrical power operations  
liaise with engineers  
maintain records of maintenance interventions  
operate forklift  
perform minor repairs to equipment  
read engineering drawings  
replace large components  
report on production results  
resolve equipment malfunctions  
respond to electrical power contingencies

Future

Essential

IoT  
Big Data  
Artificial Intelligence  
Sensors Technology

Collaborative/Autonomous Robotics  
Agile human-machine interfaces (HM)  
Augmented Reality (AR)  
Online inspection and monitoring systems  
Digital twin  
Predictive and Proactive maintenance  
Cyber-physical systems (CBS)  
Computerized Maintenance Management  
Use of digital communication tools  
Quantitative and statistical skills  
Environmental awareness  
Energy efficiency  
Platforms for energy management of equipment and plants  
Monitoring systems of energy consumption  
Knowledge and understanding of international and national standards and legislation  
Complex problem solving  
Advanced literacy  
Process analysis  
Critical thinking and decision making  
Risk management  
Cross-functional process know-how  
Continuous learning  
Complex information processing and interpretation  
Advanced data analysis and modelization

Essential

Teamwork skills

Active listening

Appropriate linguistic skills

Appropriate linguistic skills

Sustainable resource management

Resource reuse/recycling

Teaching and training others

Knowledge and understanding of quality procedures  
related to digital transformation

Adaptability and adapt to change

11

## Hydropower engineer

<http://data.europa.eu/esco/occupation/e12f08fb-4748-4388-9489-b647df60332a>

Hydropower engineers research, design and plan the building of facilities that generate electricity from the movement of water. They search optimal locations, conduct trials and try different materials to achieve the best result. Hydropower engineers develop strategies for more efficient energy production and analyse environmental consequences.

2142

Essential

knowledge

CAD software  
CAM software  
electrical power safety regulations  
electricity  
electronics principles  
energy efficiency  
energy transformation  
engineering principles  
project management  
renewable energy technologies  
technical drawings

skill/competence

approve engineering design  
design electric power systems  
draw blueprints  
examine engineering principles  
manage engineering project  
operate scientific measuring equipment  
perform project management  
perform risk analysis  
perform scientific research  
promote innovative infrastructure design  
troubleshoot  
use CAD software  
use CAM software  
use technical drawing software

Optional

knowledge

automation technology  
mechanical engineering  
oceanography

skill/competence

inspect facility sites  
promote environmental awareness  
promote sustainable energy  
research ocean energy projects  
use personal protection equipment

Future  
Essential

IoT  
Big Data  
Artificial Intelligence (AI)



Augmented Reality (AR)  
Sensors Technology  
Machine Learning  
Collaborative/Autonomous Robotics  
Agile human-machine interfaces (HM)  
Cyber-physical systems (CBS)  
Augmented Reality (AR)  
Post-processing  
Communication among components, equipment (M2M), and environment  
Online inspection and monitoring systems  
Equipment and process monitoring & its implementation  
Predictive and Proactive maintenance  
Computerized Maintenance Management  
Advanced IT skills and programming  
Advanced data analysis and modelization  
Quantitative and statistical skills  
Complex information processing and interpretation  
Complex problem solving  
Environmental awareness  
Energy efficiency  
Sustainable resource management  
Climate change risk management  
Monitoring systems of energy consumption  
Platforms for energy management of equipment and plants  
Critical thinking and decision making  
Product life cycle impact assessment  
Process analysis  
Risk management  
Continuous learning  
Adaptability and adapt to change

Essential

Resource reuse/recycling  
Sustainable resource management  
Teamwork skills  
ERP  
Conflict resolution  
Active listening  
Ethical skills  
Advanced communication skills  
Waste reduction and waste management  
Teaching and training others  
Agile human-machine interfaces (HM)  
Cyber-physical systems (CBS)  
Creativity  
Resource reuse/recycling  
Interpersonal skills and empathy

## Hydropower technician

<http://data.europa.eu/esco/occupation/7ef064b1-aab8-4818-a468-8f17acbfd995>

mechanical engineer, hydropower //  
hydroelectric plant technician // marine energy  
technician // hydroelectric technician // tidal  
power technician // wave power technician //  
hydropower mechanical engineer // hydropower  
plant technician // hydroelectric mechanical  
engineer // hydropower mechanical technician

Hydropower technicians install and maintain systems in hydropower plants. They perform inspections, analyse problems and carry out repairs. They ensure the turbines operate in compliance with regulations, and assist the hydropower engineers in the construction of turbines.

3113

Essential

knowledge

electric generators  
electrical power safety regulations  
electricity  
energy  
energy efficiency  
energy performance of buildings  
energy transformation  
engineering processes  
environmental engineering  
oceanography  
renewable energy technologies  
technical drawings

#### skill/competence

adjust engineering designs  
apply health and safety standards  
design electric power systems  
maintain electrical equipment  
manage engineering project  
monitor electric generators  
operate scientific measuring equipment  
perform risk analysis  
promote innovative infrastructure design  
troubleshoot  
use technical drawing software

#### Optional

#### knowledge

automation technology  
mechanical engineering  
power engineering  
scientific research methodology

skill/competence

conduct engineering site audits  
coordinate electricity generation  
draw blueprints  
ensure safety in electrical power operations  
inspect facility sites  
maintain records of maintenance interventions  
perform minor repairs to equipment  
perform project management  
perform scientific research  
promote environmental awareness  
promote sustainability  
promote sustainable energy  
replace large components  
research ocean energy projects  
resolve equipment malfunctions  
wear appropriate protective gear

Future

Essential

IoT  
Big Data  
Artificial Intelligence  
Collaborative/Autonomous Robotics

Agile human-machine interfaces (HM)  
Augmented Reality (AR)  
Online inspection and monitoring systems  
Predictive and Proactive maintenance  
Computerized Maintenance Management  
Advanced IT skills and programming  
Basic data input and processing  
Use of digital communication tools  
Basic numeracy and communication  
Quantitative and statistical skills  
Environmental awareness  
Energy efficiency  
Platforms for energy management of equipment and plants  
Use of drones  
Monitoring systems of energy consumption  
Knowledge and understanding of international and national standards and legislation  
Complex problem solving  
Advanced literacy  
Process analysis  
Critical thinking and decision making  
Risk management  
Cross-functional process know-how  
Continuous learning  
Complex information processing and interpretation

Essential

Teamwork skills

Active listening

Appropriate linguistic skills

Data management-safe storage

Sustainable resource management

Resource reuse/recycling

Teaching and training others

Knowledge and understanding of quality procedures  
related to digital transformation

Adaptability and adapt to change

Teaching and training others



## Hydroelectric plant operator

<http://data.europa.eu/esco/occupation/12938d1a-eeb2-4b1e-a22b-f0bebeadfb73>

hydroelectric power plant technician //  
 hydropower plant operator // hydro-power plant  
 worker // hydro-power plant operator //  
 hydroelectric plant worker // hydro plant worker //  
 hydropower plant technician // hydro-power plant  
 technician // hydro-power plant operative //  
 hydroelectric plant operative // hydropower plant  
 operative // hydro plant operative // hydropower  
 plant worker

Hydroelectric plant operators operate and maintain the equipment used in the production of energy from the movement of water. They monitor the measuring equipment, assess the production needs, and adapt the water flow to meet these needs. They also perform repairs and maintenance duties.

3131

Essential

knowledge

electric current  
electric generators  
electrical power safety regulations  
electricity  
hydraulics  
hydroelectricity

skill/competence

apply health and safety standards  
maintain electrical equipment  
maintain hydraulic systems  
monitor electric generators  
operate hydraulic machinery controls  
operate hydraulic pumps  
wear appropriate protective gear

Optional  
knowledge

electricity consumption  
renewable energy technologies  
technical drawings

skill/competence

arrange equipment repairs  
coordinate electricity generation  
develop strategies for electricity contingencies  
ensure compliance with electricity distribution  
schedule  
ensure equipment maintenance  
ensure safety in electrical power operations  
install hydraulic systems  
liaise with engineers  
maintain records of maintenance interventions  
provide advice to technicians  
read engineering drawings  
replace large components  
resolve equipment malfunctions  
respond to electrical power contingencies

Future

Essential

Artificial Intelligence  
Sensors Technology  
Collaborative/Autonomous Robotics  
Agile human-machine interfaces (HM)  
Augmented Reality (AR)  
Online inspection and monitoring systems  
Digital twin  
Predictive and Proactive maintenance  
Cyber-physical systems (CBS)  
Computerized Maintenance Management  
Use of drones  
Use of digital communication tools  
Quantitative and statistical skills  
Environmental awareness  
Energy efficiency  
Platforms for energy management of equipment and plants  
Monitoring systems of energy consumption  
Knowledge and understanding of international and national standards and legislation  
Complex problem solving  
Advanced literacy  
Process analysis  
Critical thinking and decision making  
Risk management  
Cross-functional process know-how  
Continuous learning  
Complex information processing and interpretation  
Advanced data analysis and modelization

Essential

Teamwork skills  
Active listening  
Appropriate linguistic skills  
Appropriate linguistic skills  
Sustainable resource management  
Resource reuse/recycling  
Teaching and training others  
Knowledge and understanding of quality  
procedures related to digital transformation  
Adaptability and adapt to change

## Biochemical engineer

<http://data.europa.eu/esco/occupation/f3e23761-0663-4ae0-97a2-0b2dd3fa38a1>

biochemical engineering specialist // biochemical engineering researcher // biochemical technology engineering expert // biochemical technology engineering specialist // tissue engineer // biochemical process engineer // metabolic engineer // biochemical engineering consultant // biochemical researcher // process development engineer // enzyme engineer // biochemical technology engineering consultant // biochemical engineering expert // biochemical technology engineer // bio-fuel engineer // biochemical engineering adviser // biochemical research engineer // biochemical technology engineering adviser // bio-chemical engineer

Biochemical engineers research on the field of life science striving for new discoveries. They convert those findings into chemical solutions that can improve the wellbeing of society such as vaccines, tissue repair, crops improvement and green technolog

2145

Essential  
knowledge

analytical chemistry  
biological chemistry  
biology  
engineering principles  
engineering processes  
gas chromatography  
gel permeation chromatography  
genetics  
good manufacturing practices  
high-performance liquid chromatography  
statistical process control  
toxicology

#### skill/competence

adjust engineering designs  
advise on manufacturing problems  
advise on nitrate pollution  
apply liquid chromatography  
apply statistical analysis techniques  
approve engineering design  
develop biochemical manufacturing training materials  
document analysis results  
ensure compliance with environmental legislation  
ensure compliance with safety legislation  
examine engineering principles  
interpret 2D plans  
interpret 3D plans  
manage chemical testing procedures  
perform scientific research  
run laboratory simulations  
test samples for pollutants  
use chromatography software  
use technical drawing software

#### Optional

#### knowledge



fermentation processes of food  
food materials  
food science  
food storage  
packaging engineering  
packaging processes  
pharmaceutical chemistry  
pharmaceutical drug development  
pharmaceutical industry  
pharmaceutical manufacturing quality systems  
processes of foods and beverages  
manufacturing

skill/competence

clinical biochemistry  
evolutionary biology  
medical laboratory technology  
microbiology-bacteriology  
pest control in plants  
plant disease control  
production processes  
toxicology  
virology

Future

Essential

Agile human-machine interfaces (HM)  
Cyber-physical systems (CBS)  
Augmented Reality (AR)  
Post-processing

Online inspection and monitoring systems  
Equipment and process monitoring & its implementation  
Predictive and Proactive maintenance  
Computerized Maintenance Management  
Basic digital skills  
Basic data input and processing  
Use of digital communication tools  
Knowledge and understanding of quality procedures related to digital transformation  
Leadership and managing others  
Risk management  
Adaptability and adapt to change  
Continuous learning  
Critical thinking and decision making  
Teamwork skills  
Basic numeracy and communication  
Quantitative and statistical skills  
Complex information processing and interpretation  
Process analysis  
Complex problem solving  
Environmental awareness  
Energy efficiency  
Platforms for energy management of equipment and plants  
Monitoring systems of energy consumption  
Sustainable resource management  
Waste reduction and waste management  
Resource reuse/recycling  
Product life cycle impact assessment  
Circular economy  
Climate change risk management

Optional

Business Intelligence (BI)

Knowledge and understanding of quality procedures  
related to digital transformation

ERP

Teaching and training others

15

## Biogas technician

<http://data.europa.eu/esco/occupation/6eb85dd0-1188-4081-bf54-1345fb5de3ca>

biomass gas generation technician // biogas equipment technician // anaerobic digester technician // biogas generation technician // biogas production technician // landfill gas plant technician // biogas equipment maintenance technician // biomass plant technician

Biogas technicians work in the derivation of gas from organic matter and produced as landfill gas or digested gas. They operate equipment in biogas plants, perform tests and maintenance tasks, and take action in the event of a failure.

3133

Essential

knowledge

skill/competence  
adapt energy distribution schedules  
adjust engineering designs  
approve engineering design  
carry out energy management of facilities

skill/competence

examine engineering principles  
maintain concentrated solar power systems  
maintain solar energy systems  
manage engineering project  
perform scientific research  
promote sustainable energy  
provide information on solar panels

Optional  
knowledge

test wind turbine blades  
use technical drawing software  
optional  
skill/competence  
assemble electrical components  
coordinate electricity generation

skill/competence

skill/competence  
analyse energy market trends  
assess financial viability  
coordinate electricity generation  
design utility equipment  
develop electricity distribution schedule  
ensure equipment maintenance  
inspect industrial equipment  
maintain electrical equipment  
monitor electric generators  
monitor nuclear power plant systems  
monitor utility equipment

Future

Essential



Big Data  
Artificial Intelligence  
Collaborative/Autonomous Robotics  
Agile human-machine interfaces (HM)  
Augmented Reality (AR)  
Online inspection and monitoring systems  
Predictive and Proactive maintenance  
Computerized Maintenance Management  
Advanced IT skills and programming  
Basic data input and processing  
Use of digital communication tools  
Basic numeracy and communication  
Quantitative and statistical skills  
Environmental awareness  
Energy efficiency  
Platforms for energy management of equipment and plants  
Monitoring systems of energy consumption  
Knowledge and understanding of international and national standards and legislation  
Complex problem solving  
Advanced literacy  
Process analysis  
Critical thinking and decision making  
Risk management  
Cross-functional process know-how  
Continuous learning  
Complex information processing and interpretation

Optional

Teamwork skills

Active listening

Appropriate linguistic skills

Data management-safe storage

Sustainable resource management

Resource reuse/recycling

Teaching and training others

Knowledge and understanding of quality  
procedures related to digital transformation

Adaptability and adapt to change

Teaching and training others

## Power production plant operator

<http://data.europa.eu/esco/occupation/72381086-cb6e-455e-a40b-ccb26550aab6>

wind plant operator // electric power station worker // power station operative worker // electricity generation operator // electric power station operator // power station worker // generating station operator // power station operator // biomass plant operator // electricity generating plant operative // power plant operator // electricity generation plant operator // electricity generation plant worker // electricity generation worker // electricity generation operative // electric power station operative // electricity generating plant worker

Power production plant operators maintain and operate the equipment in power stations and other energy production plants. They repair faults, operate machinery directly or from a control room, and handle materials related to electricity production in compliance with safety and environmental procedures. They facilitate interaction between electrical energy facilities, ensuring that distribution occurs safely.

3131

Essential

knowledge

automation technology  
electric current  
electric generators  
electrical power safety regulations  
electricity  
mechanics

#### skill/competence

conduct routine machinery checks  
ensure equipment maintenance  
maintain electrical equipment  
maintain power plant machinery  
monitor automated machines  
monitor electric generators  
resolve equipment malfunctions  
respond to electrical power contingencies  
use remote control equipment  
wear appropriate protective gear

#### Optional knowledge

biomass conversion  
electricity consumption  
fossil fuels  
hydroelectricity  
nuclear energy  
renewable energy technologies  
types of wind turbines

skill/competence

arrange equipment repairs  
control temperature  
develop strategies for electricity contingencies  
ensure compliance with electricity distribution  
schedule  
ensure safety in electrical power operations  
inspect wind turbines  
liaise with engineers  
maintain records of maintenance interventions  
operate automated process control  
operate boiler  
operate hydraulic machinery controls  
operate steam turbine  
perform minor repairs to equipment

Future

Essential

IoT  
Big Data  
Artificial Intelligence  
Sensors Technology  
Collaborative/Autonomous Robotics  
Agile human-machine interfaces (HM)

Agile human-machine interfaces (HMI)

Augmented Reality (AR)

Online inspection and monitoring systems

Digital twin

Predictive and Proactive maintenance

Cyber-physical systems (CPS)

Computerized Maintenance Management

Use of drones

Use of digital communication tools

Quantitative and statistical skills

Environmental awareness

Energy efficiency

Platforms for energy management of equipment and plants

Monitoring systems of energy consumption

Knowledge and understanding of international and national standards and legislation

Complex problem solving

Advanced literacy

Process analysis

Critical thinking and decision making

Risk management

Cross-functional process know-how

Continuous learning

Complex information processing and interpretation

Advanced data analysis and modelization

Optional

Teamwork skills

Active listening

Appropriate linguistic skills

Appropriate linguistic skills

Sustainable resource management

Resource reuse/recycling

Teaching and training others

Knowledge and understanding of quality procedures  
related to digital transformation

Adaptability and adapt to change



## Electric power generation engineer

<http://data.europa.eu/esco/occupation/58db3ac6-5217-4d46-8a4c-126598be1d13>

production and electric power engineer // gas generation engineer // power plant project engineer // power station engineer // energy generation engineer // control and electric power engineer // quality and electric power engineer // power supply engineer // power generation networks engineer // power generation systems engineer // electric power plant project engineer // electric power station engineer // electric power supply engineer // electricity generation engineer // power plant engineer // electric power plant engineer

Electric power generation engineers design and develop systems which generate electrical power, and develop strategies for the improvement of existing electricity generation systems. They strive to conciliate sustainable solutions with efficient and affordable solutions. They engage in projects where supply of electrical energy is required.

2151

Essential

knowledge

electric current  
electric generators  
electrical engineering  
electrical power safety regulations  
electricity  
energy  
engineering principles  
engineering processes  
renewable energy technologies  
technical drawings

skill/competence

adjust engineering designs  
approve engineering design  
design electric power systems  
develop strategies for electricity contingencies  
ensure compliance with electricity distribution  
schedule  
ensure safety in electrical power operations  
perform scientific research  
promote sustainable energy  
respond to electrical power contingencies  
shift energy demands  
use technical drawing software

Optional  
knowledge

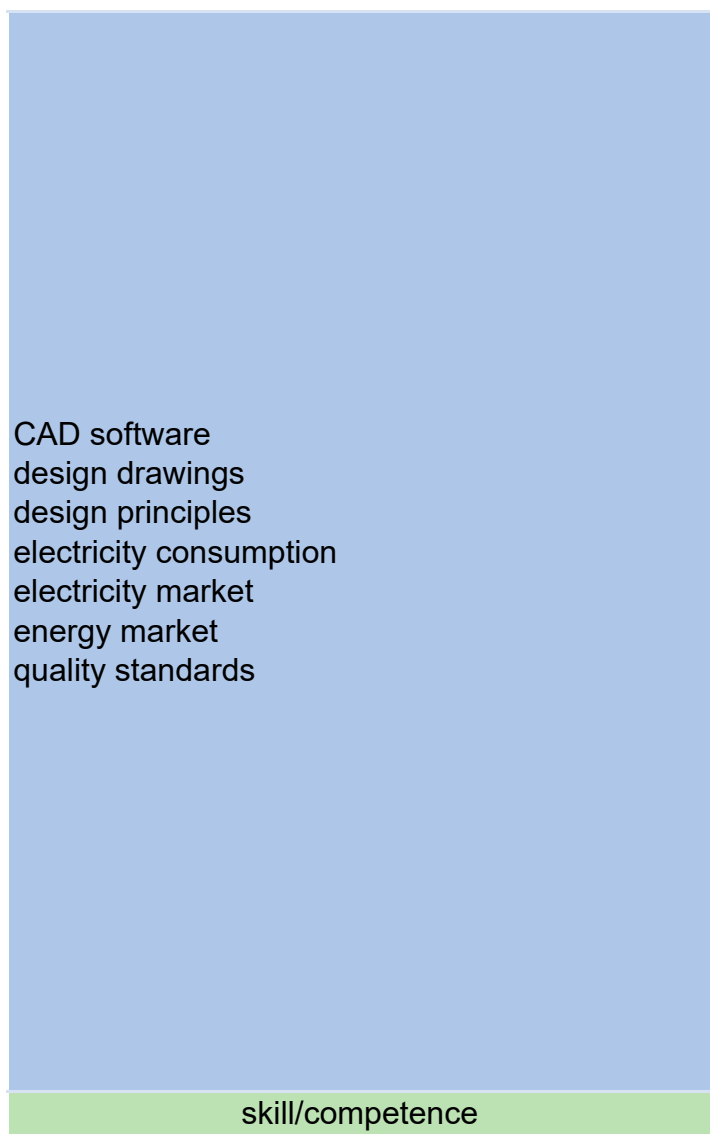

CAD software  
design drawings  
design principles  
electricity consumption  
electricity market  
energy market  
quality standards

skill/competence

analyse energy market trends  
assess financial viability  
coordinate electricity generation  
design utility equipment  
develop electricity distribution schedule  
ensure equipment maintenance  
inspect industrial equipment  
maintain electrical equipment  
monitor electric generators  
monitor nuclear power plant systems  
monitor utility equipment  
resolve equipment malfunctions  
supervise crew  
wear appropriate protective gear

Future

Essential

IoT  
Big Data  
Artificial Intelligence (AI)  
Sensors Technology  
Augmented Reality (AR)

Machine Learning  
Cloud Computing  
Agile human-machine interfaces (HM)  
Cyber-physical systems (CBS)  
Digital twin  
ERP  
Communication among components, equipment (M2M), and environment  
Online inspection and monitoring systems  
Traceability  
Computerized Maintenance Management  
Advanced IT skills and programming  
Advanced data analysis and modelization  
Data management-safe storage  
Cybersecurity  
Use of digital communication tools  
Adaptability and adapt to change  
Continuous learning  
Complex information processing and interpretation  
Complex problem solving  
Sustainable resource management  
Environmental awareness  
Energy efficiency  
Sustainable resource management  
Climate change risk management  
Monitoring systems of energy consumption  
Platforms for energy management of equipment and plants  
Critical thinking and decision making  
Product life cycle impact assessment  
Quantitative and statistical skills  
Process analysis  
Cross-functional process know-how  
Risk management

Essential

Financial literacy

Advanced communication skills

Teaching and training others

Leadership and managing others

Knowledge and understanding of quality  
procedures related to digital transformation

Conflict resolution

Waste reduction and waste management

Teaching and training others

## Energy engineer

<http://data.europa.eu/esco/occupation/b2cede50-82bb-4684-9f11-1930e12ad672>

power engineer // energy technology  
engineering specialist // energy technology  
engineering consultant // energy technology  
engineering expert // energy engineering  
specialist // energy engineering adviser // energy  
technology engineering adviser // energies  
engineer // energy engineering expert // energy  
engineering consultant // energy technology  
engineer // energy efficiency engineer

Energy engineers design new, efficient and clean ways to produce, transform, and distribute energy to improve environmental sustainability and energy efficiency. They extract energy through natural resources, such as oil or gas, or renewable and sustainable sources, such as wind or solar power.

2149

Essential

knowledge

energy market  
engineering principles  
engineering processes  
technical drawings

skill/competence

adjust engineering designs  
approve engineering design  
perform scientific research  
use technical drawing software

Optional  
knowledge



automation technology, CAD software, design drawings, design principles, electric current, electric generators, electrical discharge, electrical engineering, electrical power safety regulations, electricity, electricity consumption, electricity market, energy performance of buildings, energy transformation, environmental engineering, environmental legislation, fluid mechanics, fossil fuels, fuel distribution systems, fuel gas, gas consumption, gas market, heat transfer processes, heating, ventilation, air conditioning and refrigeration parts, hydraulics, industrial heating systems, manufacturing of steam generators, mechanical engineering, natural gas, pipeline transport regulations, pollution legislation, pollution prevention, power engineering, quality standards, refrigerants, renewable energy technologies, security requirements of goods transported via pipelines, solar energy, thermodynamics, transmission towers, types of photovoltaic panels, types of pipelines, types of wind turbines, waste and scrap products, wire harnesses, zero-energy building design

skill/competence

adapt energy distribution schedules,adjust voltage,advise on environmental remediation,advise on environmental risk management systems,advise on heating systems energy efficiency,advise on pollution prevention,advise on waste management procedures,analyse energy consumption,analyse energy market trends,analyse experimental laboratory data,assess environmental impact,assess financial viability,calculate solar panel orientation,carry out energy management of facilities,change power distribution systems,conduct engineering site audits,coordinate electricity generation,create AutoCAD drawings,create designs for pipeline engineering,design automation components,design electric power systems,design solar energy systems,design thermal equipment,design utility equipment,develop electricity distribution schedule,develop energy saving concepts,develop environmental remediation strategies,develop gas distribution schedule,develop hazardous waste management strategies,develop non-hazardous waste management strategies,develop strategies for electricity contingencies,develop

Future

Essential

IoT

Big Data

Artificial Intelligence (AI)

Sensors Technology

Augmented Reality (AR)

Machine Learning

Cloud Computing

Agile human-machine interfaces (HM)  
Cyber-physical systems (CBS)  
Digital twin  
ERP  
Communication among components, equipment (M2M), and environment  
Online inspection and monitoring systems  
Traceability  
Computerized Maintenance Management  
Advanced IT skills and programming  
Advanced data analysis and modelization  
Data management-safe storage  
Cybersecurity  
Use of digital communication tools  
Adaptability and adapt to change  
Continuous learning  
Complex information processing and interpretation  
Complex problem solving  
Sustainable resource management  
Environmental awareness  
Energy efficiency  
Sustainable resource management  
Climate change risk management  
Monitoring systems of energy consumption  
Platforms for energy management of equipment and plants  
Critical thinking and decision making  
Product life cycle impact assessment  
Quantitative and statistical skills  
Process analysis  
Cross-functional process know-how  
Risk management

Essential

Financial literacy  
Advanced communication skills  
Teaching and training others  
Leadership and managing others  
Knowledge and understanding of quality procedures  
related to digital transformation  
Conflict resolution  
Waste reduction and waste management  
Teaching and training others

## Energy systems engineer

<http://data.europa.eu/esco/occupation/1ff61522-8947-4c95-b589-cb0e0539a62b>

energy systems engineering specialist // energy systems engineering consultant // energy conservation systems engineer // energy conversion systems engineer // energy systems engineering adviser // energy systems technology engineer // energy systems technology engineering consultant // energy systems engineering expert // energy distribution systems engineer // distribution system engineer // energy systems technology engineering specialist // energy conservation engineer // environmental research engineer // energy production systems engineer // distribution project engineer // energy transmission systems engineer // energy systems technology engineering adviser // energy system engineer // energy systems technology engineering expert // distribution engineer // energy storage systems engineer // power systems engineer

Energy systems engineers supervise the energy conversion and distribution processes. They analyse the energy supply and consumption efficiency developing new ways to improve the existing processes, taking into account both the technical and the financial aspects. They also study the environmental impact of energy usage and combine the production of renewable energy in the current power systems.

2149

Essential

knowledge

electrical power safety regulations  
electricity consumption  
energy  
energy market  
energy performance of buildings  
engineering principles  
engineering processes  
environmental engineering  
renewable energy technologies  
solar energy  
technical drawings

skill/competence

adapt energy distribution schedules  
adjust engineering designs  
advise on heating systems energy efficiency  
approve engineering design  
carry out energy management of facilities  
design electric power systems  
draw blueprints  
examine engineering principles  
identify energy needs  
inspect building systems  
manage engineering project  
perform risk analysis  
perform scientific research  
promote innovative infrastructure design  
promote sustainable energy  
troubleshoot  
use technical drawing software

Optional

knowledge

fuel distribution systems  
heat transfer processes  
heating, ventilation, air conditioning and  
refrigeration parts  
industrial heating systems  
mechanical engineering  
power engineering  
thermodynamics  
types of wind turbines

skill/competence

assess financial viability  
conduct engineering site audits  
create AutoCAD drawings  
design solar energy systems  
inspect facility sites  
oversee quality control  
perform project management  
promote environmental awareness  
provide information on wind turbines  
wear appropriate protective gear

Future

Essential

IoT  
Big Data  
Artificial Intelligence (AI)  
Sensors Technology  
Augmented Reality (AR)



Machine Learning  
Cloud Computing  
Agile human-machine interfaces (HM)  
Cyber-physical systems (CBS)  
Digital twin  
ERP  
Communication among components, equipment (M2M), and environment  
Online inspection and monitoring systems  
Traceability  
Computerized Maintenance Management  
Advanced IT skills and programming  
Advanced data analysis and modelization  
Data management-safe storage  
Cybersecurity  
Use of digital communication tools  
Adaptability and adapt to change  
Continuous learning  
Complex information processing and interpretation  
Complex problem solving  
Sustainable resource management  
Environmental awareness  
Energy efficiency  
Sustainable resource management  
Climate change risk management  
Monitoring systems of energy consumption  
Platforms for energy management of equipment and plants  
Critical thinking and decision making  
Product life cycle impact assessment  
Quantitative and statistical skills  
Process analysis  
Cross-functional process know-how  
Risk management

Essential

Financial literacy

Advanced communication skills

Teaching and training others

Leadership and managing others

Knowledge and understanding of quality  
procedures related to digital transformation

Conflict resolution

Waste reduction and waste management

Teaching and training others
